# Supplementary material for: On-site separation of Cr(vi) and Cr(iii) in natural waters by parallel cartridge ion-exchange columns
Source: Royal Society of Chemistry journal article supplement (doi:10.1039/c7ra10303d), 2017-01-01
Supplement: c7ra10303d1.pdf [file c7ra10303d1.pdf]

1

2 ***Electronic Supporting Information***

3

4 **On-site separation of Cr(VI) and Cr(III) in natural waters by**  
5 **parallel cartridge ion-exchange columns**

6

7 ***Jia Zhang<sup>a</sup>, Wei Guo<sup>a,b\*</sup>, Qinghai Guo<sup>a,c\*</sup>, Lanlan Jin<sup>a</sup>, Zhifu Liu<sup>a</sup>, Shenghong***

8

***Hu<sup>a</sup>***

9 *<sup>a</sup> State Key Laboratory of Biogeology and Environmental Geology, School of Earth Sciences,*

10 *China University of Geosciences, Wuhan, 430074, PR China*

11 *<sup>b</sup> Engineering Research Center of Nano-Geo Materials of Ministry of Education, China*

12 *University of Geosciences, Wuhan, 430074, PR China*

13 *<sup>c</sup> School of Environmental Studies, China University of Geosciences, Wuhan, 430074, PR China*

14 *\*Corresponding Authors*

15 E-mail address: Wei.Guo@cug.edu.cn (W. Guo), qhguo2006@gmail.com (Q. Guo).

16

17 **Supplementary Information**

18 1. **Fig. S1.** Chemical structure of the ion exchange resin (A) SCX and (B) SAX.

19 2. **Fig. S2.** Sampling point figure of natural waters nearby a chemical factory

20 produced chrome salt in Huangshi city, China.

21 3. **Table S1.** The ions concentration of the lake waters, mg L<sup>-1</sup>.

22

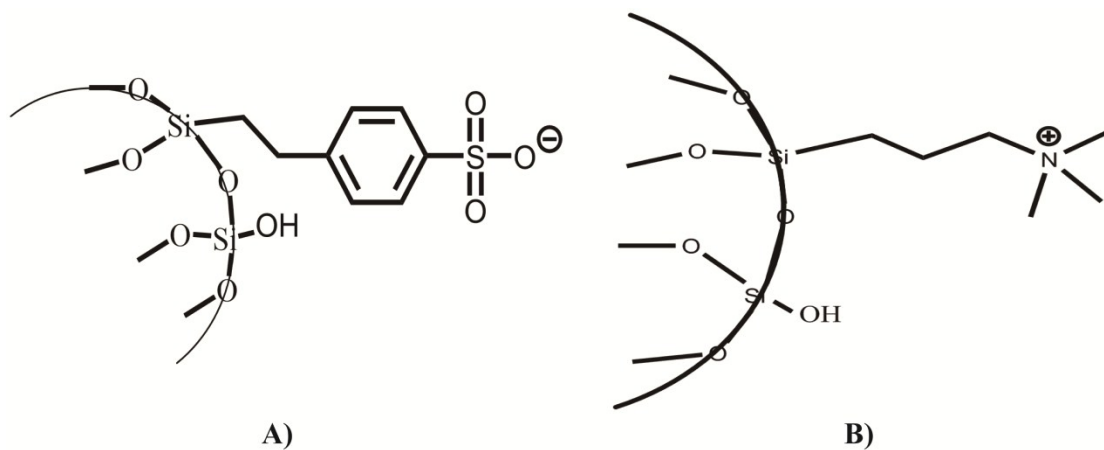

23

24

**Fig.S1** Chemical structure of the ion exchange resin (A) SCX,(B) SAX.

25

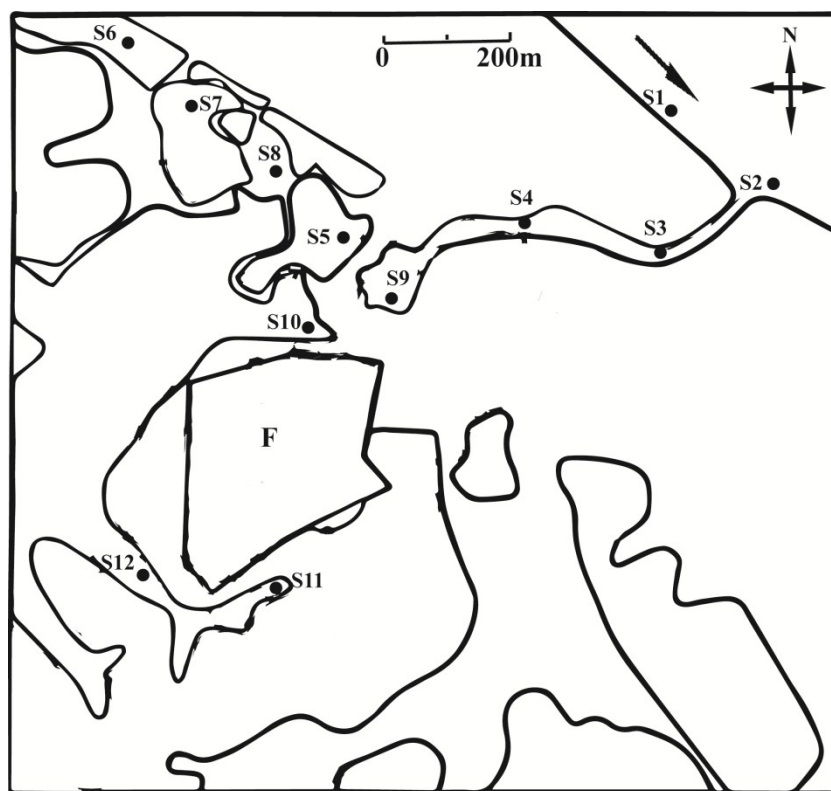

26

27 **Fig.S2** Sampling point figure of natural waters nearby a chemical factory produced chrome salt  
28 in Huangshi city, China. F: factory, S1: the water upper reaches of the Yangzi river; S2: Yangzi  
29 river water nearby drain outlet of factory, S3: the river water flows through the drain pipe, S4:

30 the river water flows through the drain pipe, S5: pond water beside the pump station near the  
 31 factory, S6: pond water in village near the factory, S7: pond water near the factory, S8: well  
 32 water on local villager, S9: the river water flows through the drain pipe, S10: pond water beside  
 33 the factory wall, S11: internal lake water beside the factory, S12: internal lake water beside the  
 34 factory.

35

36 **Table S2** The ions concentration of the lake waters, mg L<sup>-1</sup>

| Sample | F <sup>-</sup> | Cl <sup>-</sup> | NO <sub>3</sub> <sup>-</sup> | SO <sub>4</sub> <sup>2-</sup> | Total anion | Na <sup>+</sup> | Mg <sup>2+</sup> | K <sup>+</sup> | Ca <sup>2+</sup> | Fe <sup>n+</sup> | Total cation |
|--------|----------------|-----------------|------------------------------|-------------------------------|-------------|-----------------|------------------|----------------|------------------|------------------|--------------|
| S1     | 0.95           | 9.70            | 5.87                         | 30.42                         | 46.95       | 7.85            | 8.09             | 1.16           | 41.51            | 0.18             | 58.79        |
| S2     | 0.81           | 32.00           | DL                           | 43.37                         | 76.18       | 16.64           | 8.94             | 5.58           | 51.81            | 0.23             | 83.2         |
| S3     | 1.98           | 188.37          | 1.86                         | 166.37                        | 358.57      | 56.13           | 20.18            | 25.93          | 114.16           | 0.54             | 216.94       |
| S4     | 1.75           | 210.49          | 2.28                         | 144.16                        | 358.68      | 72.69           | 15.87            | 33.63          | 107.22           | 0.51             | 229.92       |
| S5     | 1.48           | 21.16           | 1.97                         | 74.59                         | 99.19       | 16.57           | 10.05            | 3.42           | 54.10            | 0.24             | 84.38        |
| S6     | 0.59           | 5.74            | 0.66                         | 17.37                         | 24.35       | 10.84           | 7.40             | 1.90           | 50.58            | 0.22             | 70.94        |
| S7     | 1.51           | 28.31           | 2.88                         | 70.18                         | 102.88      | 22.83           | 8.29             | 4.45           | 65.23            | 0.28             | 101.08       |
| S8     | 0.50           | 12.70           | 6.97                         | 28.07                         | 48.24       | 8.32            | 8.32             | 1.06           | 43.51            | 0.19             | 61.4         |
| S9     | 1.59           | 143.77          | 3.05                         | 113.11                        | 261.52      | 56.40           | 12.20            | 24.29          | 93.96            | 0.40             | 187.25       |
| S10    | 1.90           | 100.02          | 3.27                         | 120.73                        | 225.92      | 37.75           | 14.17            | 13.99          | 90.91            | 0.40             | 157.22       |
| S11    | 1.67           | 10.67           | 0.43                         | 133.09                        | 145.86      | 50.13           | 18.27            | 3.16           | 67.60            | 0.29             | 139.45       |
| S12    | 1.66           | 13.63           | 0.46                         | 149.28                        | 165.02      | DL              | 14.34            | 3.12           | 42.70            | 0.18             | 60.34        |

37

38

39
